# Supplementary material
Source: PubMed Central journal article supplement (PMC3715284)
Supplement: gmb-36-185-s003.pdf [file gmb-36-185-s003.pdf]

**Table S3.** Exclusion power (Q) estimated for each SNP in the following cases: two parents known, one parent known, missing parents, and matching samples. Match probability (MP) calculated for matching samples. Markers are listed in order of decreasing Q values.

| SNP                                   | two parents | one parent | Missing parents | Match  | MP     |
|---------------------------------------|-------------|------------|-----------------|--------|--------|
| ARS-USMARC-Parent-DQ786760-no-rs      | 0.1875      | 0.1250     | 0.2813          | 0.6250 | 0.3750 |
| ARS-USMARC-Parent-AY857620-rs17871214 | 0.1875      | 0.1250     | 0.2813          | 0.6250 | 0.3750 |
| ARS-USMARC-Parent-AY914316-rs17871403 | 0.1875      | 0.1250     | 0.2813          | 0.6250 | 0.3750 |
| ARS-USMARC-Parent-DQ786757-rs29019900 | 0.1875      | 0.1250     | 0.2813          | 0.6250 | 0.3750 |
| ARS-USMARC-Parent-AY842474-rs29003226 | 0.1874      | 0.1248     | 0.2811          | 0.6248 | 0.3752 |
| ARS-USMARC-Parent-DQ786761-rs29012840 | 0.1874      | 0.1248     | 0.2811          | 0.6248 | 0.3752 |
| ARS-USMARC-Parent-DQ846693-rs29017621 | 0.1874      | 0.1248     | 0.2811          | 0.6248 | 0.3752 |
| ARS-USMARC-Parent-AY916666-no-rs      | 0.1874      | 0.1248     | 0.2811          | 0.6248 | 0.3752 |
| ARS-USMARC-Parent-DQ404152-rs29022245 | 0.1874      | 0.1248     | 0.2811          | 0.6248 | 0.3752 |
| ARS-USMARC-Parent-EF042091-rs29014974 | 0.1874      | 0.1248     | 0.2811          | 0.6248 | 0.3752 |
| ARS-USMARC-Parent-DQ984827-rs29012019 | 0.1871      | 0.1242     | 0.2808          | 0.6242 | 0.3758 |
| ARS-USMARC-Parent-DQ451555-rs29010795 | 0.1871      | 0.1242     | 0.2808          | 0.6242 | 0.3758 |
| ARS-USMARC-Parent-DQ489377-rs29026932 | 0.1871      | 0.1242     | 0.2808          | 0.6242 | 0.3758 |
| ARS-USMARC-Parent-EF034085-rs29025677 | 0.1871      | 0.1242     | 0.2808          | 0.6242 | 0.3758 |
| ARS-USMARC-Parent-AY937242-rs17872223 | 0.1866      | 0.1233     | 0.2802          | 0.6232 | 0.3768 |
| ARS-USMARC-Parent-DQ846695-no-rs      | 0.1866      | 0.1233     | 0.2802          | 0.6232 | 0.3768 |
| ARS-USMARC-Parent-DQ888312-rs29015945 | 0.1866      | 0.1233     | 0.2802          | 0.6232 | 0.3768 |
| ARS-USMARC-Parent-AY856094-rs17871190 | 0.1866      | 0.1232     | 0.2801          | 0.6231 | 0.3769 |
| ARS-USMARC-Parent-AY853303-no-rs      | 0.1859      | 0.1219     | 0.2793          | 0.6219 | 0.3781 |
| ARS-USMARC-Parent-DQ888310-rs29012422 | 0.1859      | 0.1219     | 0.2793          | 0.6219 | 0.3781 |
| ARS-USMARC-Parent-EF042090-no-rs      | 0.1859      | 0.1219     | 0.2793          | 0.6219 | 0.3781 |
| ARS-USMARC-Parent-AY844963-rs17871338 | 0.1859      | 0.1219     | 0.2793          | 0.6219 | 0.3781 |
| ARS-USMARC-Parent-DQ846694-rs29015842 | 0.1859      | 0.1219     | 0.2793          | 0.6219 | 0.3781 |
| ARS-USMARC-Parent-DQ990835-rs29012811 | 0.1859      | 0.1219     | 0.2793          | 0.6219 | 0.3781 |
| ARS-USMARC-Parent-EF150946-rs29023666 | 0.1859      | 0.1219     | 0.2793          | 0.6219 | 0.3781 |
| ARS-USMARC-Parent-AY851163-rs17871661 | 0.1851      | 0.1202     | 0.2782          | 0.6200 | 0.3800 |
| ARS-USMARC-Parent-AY929334-no-rs      | 0.1851      | 0.1202     | 0.2782          | 0.6200 | 0.3800 |
| ARS-USMARC-Parent-DQ990833-rs29010147 | 0.1851      | 0.1202     | 0.2782          | 0.6200 | 0.3800 |
| ARS-USMARC-Parent-AY851162-no-rs      | 0.1851      | 0.1202     | 0.2782          | 0.6200 | 0.3800 |
| ARS-USMARC-Parent-DQ381153-rs29012842 | 0.1849      | 0.1200     | 0.2780          | 0.6197 | 0.3803 |
| ARS-USMARC-Parent-DQ674265-rs29011266 | 0.1849      | 0.1200     | 0.2780          | 0.6197 | 0.3803 |
| ARS-USMARC-Parent-AY776154-no-rs      | 0.1840      | 0.1182     | 0.2769          | 0.6178 | 0.3822 |
| ARS-USMARC-Parent-AY858890-rs29002256 | 0.1840      | 0.1182     | 0.2769          | 0.6178 | 0.3822 |
| ARS-USMARC-Parent-DQ500958-no-rs      | 0.1840      | 0.1182     | 0.2769          | 0.6178 | 0.3822 |
| ARS-USMARC-Parent-DQ647188-rs29011099 | 0.1840      | 0.1182     | 0.2769          | 0.6178 | 0.3822 |
| ARS-USMARC-Parent-DQ837645-rs29015870 | 0.1840      | 0.1182     | 0.2769          | 0.6178 | 0.3822 |
| ARS-USMARC-Parent-DQ916058-rs29016146 | 0.1840      | 0.1182     | 0.2769          | 0.6178 | 0.3822 |
| ARS-USMARC-Parent-EF028073-rs29014953 | 0.1838      | 0.1178     | 0.2766          | 0.6173 | 0.3827 |

|                                       |        |        |        |        |        |
|---------------------------------------|--------|--------|--------|--------|--------|
| ARS-USMARC-Parent-DQ647190-rs29013632 | 0.1827 | 0.1157 | 0.2753 | 0.6150 | 0.3850 |
| ARS-USMARC-Parent-AY850194-no-rs      | 0.1827 | 0.1157 | 0.2753 | 0.6150 | 0.3850 |
| ARS-USMARC-Parent-EF034080-rs29024749 | 0.1827 | 0.1157 | 0.2753 | 0.6150 | 0.3850 |
| ARS-USMARC-Parent-DQ846692-rs29010281 | 0.1824 | 0.1152 | 0.2749 | 0.6144 | 0.3856 |
| ARS-USMARC-Parent-DQ888313-no-rs      | 0.1812 | 0.1130 | 0.2734 | 0.6117 | 0.3883 |
| ARS-USMARC-Parent-EF034082-rs29013532 | 0.1812 | 0.1130 | 0.2734 | 0.6117 | 0.3883 |
| ARS-USMARC-Parent-DQ786762-rs29010772 | 0.1808 | 0.1123 | 0.2730 | 0.6109 | 0.3891 |
| ARS-USMARC-Parent-EF093509-rs29015170 | 0.1808 | 0.1123 | 0.2730 | 0.6109 | 0.3891 |
| ARS-USMARC-Parent-AY853302-no-rs      | 0.1794 | 0.1099 | 0.2713 | 0.6079 | 0.3921 |
| ARS-USMARC-Parent-DQ786763-rs29020472 | 0.1794 | 0.1099 | 0.2713 | 0.6079 | 0.3921 |
| ARS-USMARC-Parent-EF034083-rs29018286 | 0.1794 | 0.1099 | 0.2713 | 0.6079 | 0.3921 |
| ARS-USMARC-Parent-DQ650636-rs29024525 | 0.1790 | 0.1090 | 0.2708 | 0.6068 | 0.3932 |
| ARS-USMARC-Parent-DQ839235-rs29012691 | 0.1790 | 0.1090 | 0.2708 | 0.6068 | 0.3932 |
| ARS-USMARC-Parent-DQ846688-rs29023691 | 0.1790 | 0.1090 | 0.2708 | 0.6068 | 0.3932 |
| ARS-USMARC-Parent-DQ837644-rs29010468 | 0.1790 | 0.1090 | 0.2708 | 0.6068 | 0.3932 |
| ARS-USMARC-Parent-DQ404153-no-rs      | 0.1775 | 0.1065 | 0.2690 | 0.6035 | 0.3965 |
| ARS-USMARC-Parent-EF026085-rs29021607 | 0.1775 | 0.1065 | 0.2690 | 0.6035 | 0.3965 |
| ARS-USMARC-Parent-AY841151-rs29003466 | 0.1775 | 0.1065 | 0.2690 | 0.6035 | 0.3965 |
| ARS-USMARC-Parent-EF034081-rs29009668 | 0.1775 | 0.1065 | 0.2690 | 0.6035 | 0.3965 |
| ARS-USMARC-Parent-DQ789028-rs29017713 | 0.1769 | 0.1054 | 0.2682 | 0.6021 | 0.3979 |
| ARS-USMARC-Parent-EF089234-rs29020870 | 0.1769 | 0.1054 | 0.2682 | 0.6021 | 0.3979 |
| ARS-USMARC-Parent-DQ422949-rs29011466 | 0.1753 | 0.1027 | 0.2663 | 0.5984 | 0.4016 |
| ARS-USMARC-Parent-DQ485413-no-rs      | 0.1753 | 0.1027 | 0.2663 | 0.5984 | 0.4016 |
| ARS-USMARC-Parent-DQ435443-rs29010802 | 0.1753 | 0.1027 | 0.2663 | 0.5984 | 0.4016 |
| ARS-USMARC-Parent-DQ846690-no-rs      | 0.1753 | 0.1027 | 0.2663 | 0.5984 | 0.4016 |
| ARS-USMARC-Parent-DQ888309-rs29013741 | 0.1753 | 0.1027 | 0.2663 | 0.5984 | 0.4016 |
| ARS-USMARC-Parent-AY941204-rs17872131 | 0.1728 | 0.0988 | 0.2634 | 0.5926 | 0.4074 |
| ARS-USMARC-Parent-DQ422950-rs29012306 | 0.1728 | 0.0988 | 0.2634 | 0.5926 | 0.4074 |
| ARS-USMARC-Parent-DQ786765-rs29009858 | 0.1728 | 0.0988 | 0.2634 | 0.5926 | 0.4074 |
| ARS-USMARC-Parent-EF093511-rs29012316 | 0.1710 | 0.0958 | 0.2611 | 0.5880 | 0.4120 |
| ARS-USMARC-Parent-DQ866817-no-rs      | 0.1701 | 0.0945 | 0.2601 | 0.5860 | 0.4140 |
| ARS-USMARC-Parent-DQ990832-rs29015065 | 0.1701 | 0.0945 | 0.2601 | 0.5860 | 0.4140 |
| ARS-USMARC-Parent-AY943841-rs17871566 | 0.1691 | 0.0929 | 0.2589 | 0.5834 | 0.4166 |
| ARS-USMARC-Parent-DQ837646-rs29012894 | 0.1691 | 0.0929 | 0.2589 | 0.5834 | 0.4166 |
| ARS-USMARC-Parent-AY939849-rs17870274 | 0.1672 | 0.0901 | 0.2566 | 0.5786 | 0.4214 |
| ARS-USMARC-Parent-DQ995976-no-rs      | 0.1672 | 0.0901 | 0.2566 | 0.5786 | 0.4214 |
| ARS-USMARC-Parent-DQ984825-rs29012457 | 0.1659 | 0.0882 | 0.2551 | 0.5754 | 0.4246 |
| ARS-USMARC-Parent-DQ786759-rs29026696 | 0.1639 | 0.0854 | 0.2527 | 0.5703 | 0.4297 |
| ARS-USMARC-Parent-EF026087-rs29011643 | 0.1639 | 0.0854 | 0.2527 | 0.5703 | 0.4297 |
| ARS-USMARC-Parent-EF093512-rs29013546 | 0.1624 | 0.0833 | 0.2509 | 0.5664 | 0.4336 |
| ARS-USMARC-Parent-DQ837643-rs29018818 | 0.1604 | 0.0805 | 0.2484 | 0.5610 | 0.4390 |
| ARS-USMARC-Parent-AY842475-rs29002127 | 0.1565 | 0.0755 | 0.2438 | 0.5506 | 0.4494 |
| ARS-USMARC-Parent-DQ468384-rs29003967 | 0.1523 | 0.0703 | 0.2388 | 0.5391 | 0.4609 |
| ARS-USMARC-Parent-DQ984826-rs29027559 | 0.1523 | 0.0703 | 0.2388 | 0.5391 | 0.4609 |
| ARS-USMARC-Parent-DQ404149-no-rs      | 0.1523 | 0.0703 | 0.2388 | 0.5391 | 0.4609 |
| ARS-USMARC-Parent-DQ786758-rs29024430 | 0.1478 | 0.0651 | 0.2333 | 0.5263 | 0.4737 |

|                                       |        |        |        |        |        |
|---------------------------------------|--------|--------|--------|--------|--------|
| ARS-USMARC-Parent-DQ786766-rs29012070 | 0.1478 | 0.0651 | 0.2333 | 0.5263 | 0.4737 |
| ARS-USMARC-Parent-DQ984828-rs29010004 | 0.1478 | 0.0651 | 0.2333 | 0.5263 | 0.4737 |
| ARS-USMARC-Parent-EF034086-no-rs      | 0.1478 | 0.0651 | 0.2333 | 0.5263 | 0.4737 |
| ARS-USMARC-Parent-DQ470475-no-rs      | 0.1452 | 0.0622 | 0.2301 | 0.5188 | 0.4812 |
| ARS-USMARC-Parent-DQ647186-rs29014143 | 0.1430 | 0.0597 | 0.2273 | 0.5121 | 0.4879 |
| ARS-USMARC-Parent-AY942198-rs29003010 | 0.1430 | 0.0597 | 0.2273 | 0.5121 | 0.4879 |
| ARS-USMARC-Parent-DQ846689-rs29011985 | 0.1430 | 0.0597 | 0.2273 | 0.5121 | 0.4879 |
| ARS-USMARC-Parent-EF026084-rs29025380 | 0.1430 | 0.0597 | 0.2273 | 0.5121 | 0.4879 |
| ARS-USMARC-Parent-DQ832700-rs29012872 | 0.1377 | 0.0544 | 0.2208 | 0.4965 | 0.5035 |
| ARS-USMARC-Parent-AY919868-rs29002211 | 0.1377 | 0.0544 | 0.2208 | 0.4965 | 0.5035 |
| ARS-USMARC-Parent-DQ404150-rs29012530 | 0.1377 | 0.0544 | 0.2208 | 0.4965 | 0.5035 |
| ARS-USMARC-Parent-DQ990834-rs29013727 | 0.1344 | 0.0512 | 0.2166 | 0.4864 | 0.5136 |
| ARS-USMARC-Parent-EF026086-rs29013660 | 0.1344 | 0.0512 | 0.2166 | 0.4864 | 0.5136 |
| ARS-USMARC-Parent-EF141102-rs29015783 | 0.1321 | 0.0491 | 0.2137 | 0.4793 | 0.5207 |
| ARS-USMARC-Parent-EF093510-rs29010035 | 0.1284 | 0.0457 | 0.2089 | 0.4677 | 0.5323 |
| ARS-USMARC-Parent-DQ650635-rs29012174 | 0.1219 | 0.0404 | 0.2004 | 0.4471 | 0.5529 |
| ARS-USMARC-Parent-DQ866818-rs29011701 | 0.1219 | 0.0404 | 0.2004 | 0.4471 | 0.5529 |
| ARS-USMARC-Parent-AY842473-rs29001956 | 0.1196 | 0.0386 | 0.1974 | 0.4398 | 0.5602 |
| ARS-USMARC-Parent-DQ995977-rs29020834 | 0.1196 | 0.0386 | 0.1974 | 0.4398 | 0.5602 |
| ARS-USMARC-Parent-DQ916059-rs29009907 | 0.1127 | 0.0335 | 0.1881 | 0.4172 | 0.5828 |
| ARS-USMARC-Parent-DQ647187-rs29010510 | 0.1053 | 0.0286 | 0.1779 | 0.3926 | 0.6074 |
| ARS-USMARC-Parent-DQ846691-rs29019814 | 0.1053 | 0.0286 | 0.1779 | 0.3926 | 0.6074 |
| ARS-USMARC-Parent-AY761135-rs29003723 | 0.1039 | 0.0277 | 0.1760 | 0.3879 | 0.6121 |
| ARS-USMARC-Parent-AY849380-no-rs      | 0.0974 | 0.0239 | 0.1668 | 0.3657 | 0.6343 |
| ARS-USMARC-Parent-DQ916057-rs29009979 | 0.0890 | 0.0195 | 0.1545 | 0.3365 | 0.6635 |
| ARS-USMARC-Parent-EF164803-rs29011141 | 0.0890 | 0.0195 | 0.1545 | 0.3365 | 0.6635 |
| ARS-USMARC-Parent-DQ404151-rs29019282 | 0.0819 | 0.0162 | 0.1439 | 0.3114 | 0.6886 |
| ARS-USMARC-Parent-DQ647189-rs29012226 | 0.0801 | 0.0154 | 0.1411 | 0.3049 | 0.6951 |
| ARS-USMARC-Parent-DQ888311-rs29017313 | 0.0706 | 0.0117 | 0.1263 | 0.2705 | 0.7295 |
| ARS-USMARC-Parent-EF034084-rs29016185 | 0.0604 | 0.0084 | 0.1100 | 0.2334 | 0.7666 |
| ARS-USMARC-Parent-AY842472-rs29001941 | 0.0383 | 0.0032 | 0.0723 | 0.1502 | 0.8498 |
| ARS-USMARC-Parent-EF034087-no-rs      | 0.0135 | 0.0004 | 0.0265 | 0.0537 | 0.9463 |

---
