# Supplementary material
Source: PubMed Central journal article supplement (PMC3715284)
Supplement: gmb-36-185-s004.pdf [file gmb-36-185-s004.pdf]

**Table S4** Exclusion power (Q) estimated for each STR in the following cases: two parents known, one parent known, missing parents and matching samples. Match probability (MP) calculated for matching samples. Markers are listed in order of decreasing Q values

| Locus          | two parents | one parent | Missing parents | Match  | MP     |
|----------------|-------------|------------|-----------------|--------|--------|
| <b>ETH225</b>  | 0.5941      | 0.4152     | 0.7745          | 0.9270 | 0.0730 |
| <b>BM2113</b>  | 0.5893      | 0.4103     | 0.7757          | 0.9245 | 0.0755 |
| <b>TGLA227</b> | 0.5182      | 0.3405     | 0.7022          | 0.8944 | 0.1056 |
| <b>TGLA126</b> | 0.5175      | 0.3408     | 0.7002          | 0.8941 | 0.1059 |
| <b>RM067</b>   | 0.5050      | 0.3283     | 0.6915          | 0.8871 | 0.1129 |
| <b>BRR</b>     | 0.4720      | 0.2851     | 0.6789          | 0.8670 | 0.1330 |
| <b>ETH3</b>    | 0.4537      | 0.2811     | 0.6310          | 0.8624 | 0.1376 |
| <b>HAUT27</b>  | 0.4453      | 0.2726     | 0.6342          | 0.8520 | 0.1480 |
| <b>TGLA53</b>  | 0.4395      | 0.2681     | 0.6264          | 0.8489 | 0.1511 |
| <b>INRA023</b> | 0.4273      | 0.2614     | 0.6088          | 0.8410 | 0.1590 |
| <b>BM1824</b>  | 0.4004      | 0.2347     | 0.5768          | 0.8260 | 0.1740 |
| <b>ETH10</b>   | 0.3637      | 0.1882     | 0.5587          | 0.7856 | 0.2144 |
| <b>CSRM60</b>  | 0.3419      | 0.1814     | 0.5180          | 0.7731 | 0.2269 |
| <b>BM1818</b>  | 0.3048      | 0.1524     | 0.4672          | 0.7405 | 0.2595 |
| <b>TGLA122</b> | 0.2954      | 0.1314     | 0.4767          | 0.7099 | 0.3603 |
| <b>SPS115</b>  | 0.2423      | 0.1006     | 0.3929          | 0.6525 | 0.3475 |
| <b>CSSM66</b>  | 0.2074      | 0.1182     | 0.3165          | 0.6397 | 0.3603 |
| <b>HEL1</b>    | 0.1272      | 0.0309     | 0.2249          | 0.4203 | 0.5797 |
