# Supplementary material
Source: PubMed Central journal article supplement (PMC3715284)
Supplement: gmb-36-185-s006.pdf [file gmb-36-185-s006.pdf]

**Table S6** Cumulative non-exclusion power (1 - Q) calculated for STR considering one and two mismatch criteria ( $Q_1$  and  $Q_2$ ) in the following cases: two parents known, one parent known, missing parents, and matching samples. Match probability (MP) calculated for matching samples. Markers are listed in order of decreasing gene diversity ( $h_e$ ). Bold underlined when cumulative 1 - Q reach to 1.0E-4 ( $Q = 0.999$ )

| Locus N° | STR     | two parents    |                | one parent |           | Missing parents |                | Match          |                | MP         |
|----------|---------|----------------|----------------|------------|-----------|-----------------|----------------|----------------|----------------|------------|
|          |         | 1 - $Q_1$      | 1 - $Q_2$      | 1 - $Q_1$  | 1 - $Q_2$ | 1 - $Q_1$       | 1 - $Q_2$      | 1 - $Q_1$      | 1 - $Q_2$      |            |
| 1        | ETH225  | 4.1E-01        | -              | 5.9E-01    | -         | 2.3E-01         | -              | 8.0E-02        | -              | 0.07297941 |
| 2        | BM2113  | 1.7E-01        | 6.5E-01        | 3.5E-01    | 8.3E-01   | 5.1E-02         | 4.0E-01        | 6.0E-03        | 1.4E-01        | 0.00551324 |
| 3        | TGLA227 | 8.1E-02        | 4.0E-01        | 2.3E-01    | 6.7E-01   | 1.5E-02         | 1.5E-01        | <b>6.0E-04</b> | 2.0E-02        | 0.00058243 |
| 4        | TGLA126 | 3.9E-02        | 2.3E-01        | 1.5E-01    | 5.2E-01   | 5.0E-03         | 5.7E-02        | 7.0E-05        | 3.0E-03        | 6.1679E-05 |
| 5        | RM067   | 1.9E-02        | 1.4E-01        | 1.0E-01    | 4.0E-01   | <b>8.0E-04</b>  | 2.1E-02        | 7.0E-06        | <b>4.0E-04</b> | 6.9633E-06 |
| 6        | ETH3    | 1.1E-02        | 8.3E-02        | 7.2E-02    | 3.1E-01   | 6.0E-04         | 9.0E-03        | 1.0E-06        | 6.0E-05        | 9.5781E-07 |
| 7        | HAUT27  | 6.0E-03        | 5.1E-02        | 5.3E-02    | 2.5E-01   | 2.0E-04         | 3.0E-03        | 2.0E-07        | 9.0E-06        | 1.4179E-07 |
| 8        | TGLA53  | 3.0E-03        | 3.1E-02        | 3.9E-02    | 2.0E-01   | 8.0E-05         | 2.0E-03        | 3.0E-08        | 2.0E-06        | 2.1429E-08 |
| 9        | BRR     | 2.0E-03        | 1.8E-02        | 2.8E-02    | 1.5E-01   | 3.0E-05         | <b>5.0E-04</b> | 3.0E-09        | 3.0E-07        | 2.8508E-09 |
| 10       | INRA023 | 1.0E-03        | 1.1E-02        | 2.1E-02    | 1.2E-01   | 9.0E-06         | 3.0E-04        | 4.5E-10        | 3.6E-08        | 4.5326E-10 |
| 11       | BM1824  | <b>6.0E-04</b> | 7.0E-03        | 1.6E-02    | 9.5E-02   | 4.0E-06         | 1.0E-04        | 8.0E-11        | 7.0E-09        | 7.8866E-11 |
| 12       | CSRM60  | 4.0E-04        | 5.0E-03        | 1.3E-02    | 8.1E-02   | 2.0E-06         | 5.0E-05        | 8.0E-11        | 7.0E-09        | 1.7891E-11 |
| 13       | ETH10   | 3.0E-04        | 3.0E-03        | 1.0E-02    | 6.8E-02   | 8.0E-07         | 3.0E-05        | 4.0E-12        | 4.0E-10        | 3.8368E-12 |
| 14       | BM1818  | 2.0E-04        | 2.0E-03        | 9.0E-03    | 5.9E-02   | 5.0E-07         | 2.0E-05        | 1.0E-12        | 1.0E-10        | 9.9549E-13 |
| 15       | CSSM66  | 2.0E-04        | 2.0E-03        | 8.0E-03    | 5.3E-02   | 3.0E-07         | 9.0E-06        | 4.0E-13        | 4.0E-11        | 3.5866E-13 |
| 16       | TGLA122 | 1.0E-04        | 1.4E-03        | 7.0E-03    | 4.7E-02   | 2.0E-07         | 5.0E-06        | 1.0E-13        | 2.0E-11        | 9.3059E-14 |
| 17       | SPS115  | 7.0E-05        | 1.1E-03        | 6.1E-03    | 4.3E-02   | 1.0E-07         | 3.0E-06        | 1.0E-13        | 4.0E-12        | 3.2339E-14 |
| 18       | HEL1    | 6.0E-05        | <b>9.0E-04</b> | 5.9E-03    | 4.2E-02   | 1.0E-08         | 3.0E-06        | 3.0E-14        | 3.0E-12        | 1.8748E-14 |
