# Supplementary material
Source: PubMed Central journal article supplement (PMC3715284)
Supplement: gmb-36-185-s007.pdf [file gmb-36-185-s007.pdf]

**Table S7** Match probability values obtained in recent studies of individual genetic traceability in cattle using microsatellites (short tandem repeats, STR) or single nucleotide polymorphism (up date form Dalvit *et al.*, 2007 and Baldo *et al.*, 2010)

| Type and number of markers | Match probability        | Breeds                                                                       | References                        |
|----------------------------|--------------------------|------------------------------------------------------------------------------|-----------------------------------|
| SNP – 116                  | $10^{-44}$               | Angus                                                                        | Present work                      |
| SNP - 50                   | $10^{-22}$               | Angus                                                                        | Present work                      |
| SNP - 32                   | $10^{-14}$               | Angus                                                                        | Present work                      |
| SNP - 25                   | $10^{-11}$               | Angus                                                                        | Present work                      |
| STR - 18                   | $10^{-14}$               | Angus                                                                        | Present work                      |
| STR - 12                   | $10^{-12}$               | Angus                                                                        | Present work                      |
| SNP - 43                   | $10^{-11}$ to $10^{-13}$ | Limousin, Belgian Blue, Simmental, Charolais, Aberdeen Angus, Holstein       | Allen et al. (2010)               |
| STR - 11                   | $10^{-9}$                | Limousin, Belgian Blue, Simmental, Charolais, Aberdeen Angus, Holstein       | Allen et al. (2010)               |
| STR - 11                   | $10^{-8}$ to $10^{-11}$  | Angus                                                                        | Baldo et al. (2010)               |
| SNP - 87                   | $10^{-34}$               | Japanese black                                                               | Hara et al. (2010b)               |
| SNP - 29                   | $10^{-12}$               | Japanese black                                                               | Hara et al. (2010a)               |
| SNP - 50                   | $10^{-15}$               | Several breeds                                                               | HapMap Consortium (2009)          |
| SNP - 25                   | $10^{-8}$ to $10^{-10}$  | Holstein, Simmental, Limousin, Angus, Charolais, Tux Cattle                  | Karniol et al. (2009)             |
| STR - 12                   | $> 1.4 \times 10^{-8}$   | Piemontese, Chianina, Marchigiana, Romagnola, Holstein Friesian, Brown Swiss | Dalvit et al. (2008)              |
| SNP – 28                   |                          | Angus, Hereford                                                              | Van Eenennaam et al. (2007)       |
| STR - 23                   |                          | Angus, Hereford                                                              | Van Eenennaam et al. (2007)       |
| STR – 12                   | $1.9 \times 10^{-11}$    | Piemontese, Chianina, Marchigiana, Romagnola                                 | Dalvit et al. (2006)              |
| SNP - 25                   | $5 \times 10^{-6}$       | Simulated data                                                               | Weller et al. (2006)              |
| STR– 10                    | $2.4 \times 10^{-8}$     | Galloway                                                                     | Herraéz et al. (2005)             |
| STR – 17                   | $1.4 \times 10^{-13}$    | Galloway                                                                     | Herraéz et al. (2005)             |
| SNP – 43                   | $5.3 \times 10^{-11}$    | Galloway                                                                     | Herraéz et al. (2005)             |
| SNP – 20                   | $4.3 \times 10^{-8}$     | Holstein Friesian, and others                                                | Heaton et al. (2005)              |
| SNP - 37                   | $10^{-13}$               | Holstein, German Fleckvieh, German Braunvieh                                 | Werner et al. (2004)              |
| SNP – 32                   | $2.0 \times 10^{-13}$    | American Angus                                                               | Heaton et al. (2002)              |
| SNP – 32                   | $1.9 \times 10^{-10}$    | multi-breed composite populations                                            | Heaton et al. (2002)              |
| STR – 10                   | $>10^{-7}$               | Pirenaica                                                                    | Arana et al. (2002)               |
| STR – 13                   | $>10^{-15}$              | Piemontese, Chinina, Holstein Friesian, Italian Simmental                    | Orrù et al. (2006)                |
| STR – 11                   | $5 \times 10^{-12}$      | Charolaise                                                                   | San Cristobal-Gaudy et al. (2000) |
| STR – 10                   | $1 \times 10^{-10}$      | Belgium beef cattle                                                          | Peelman et al. (1998)             |
