# Supplementary material
Source: PubMed Central journal article supplement (PMC3715284)

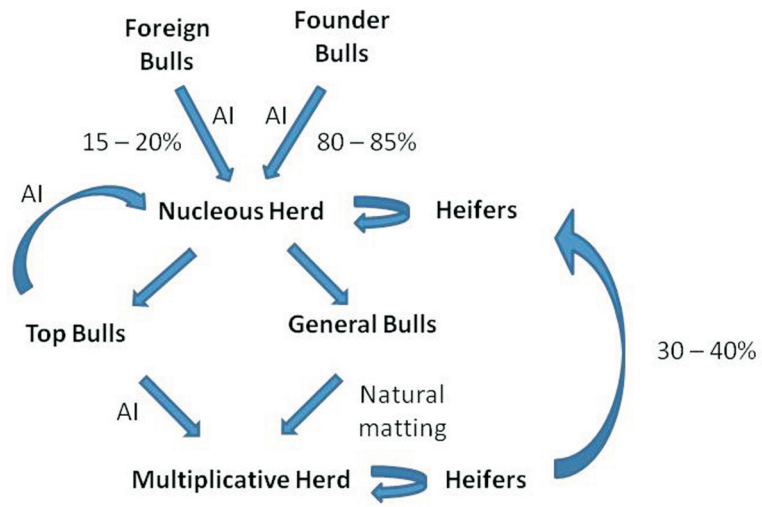

**Figure S1** - Schematic diagram of the breeding system used.

Supplement: gmb-36-185-s008.pdf [file gmb-36-185-s008.pdf]
